# Supplementary material
Source: PubMed Central journal article supplement (PMC9404532)

# Extended Data Fig. 2

**C**

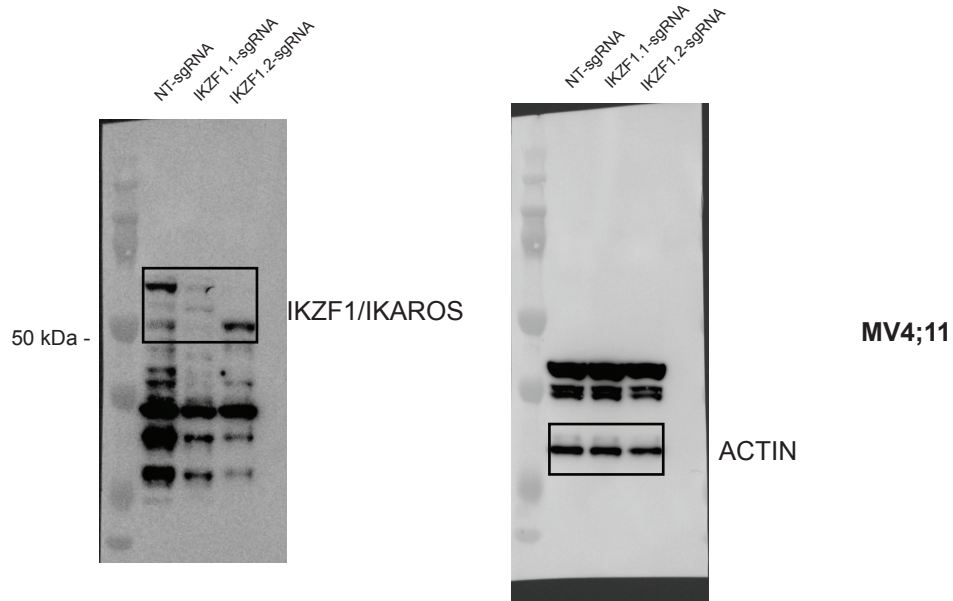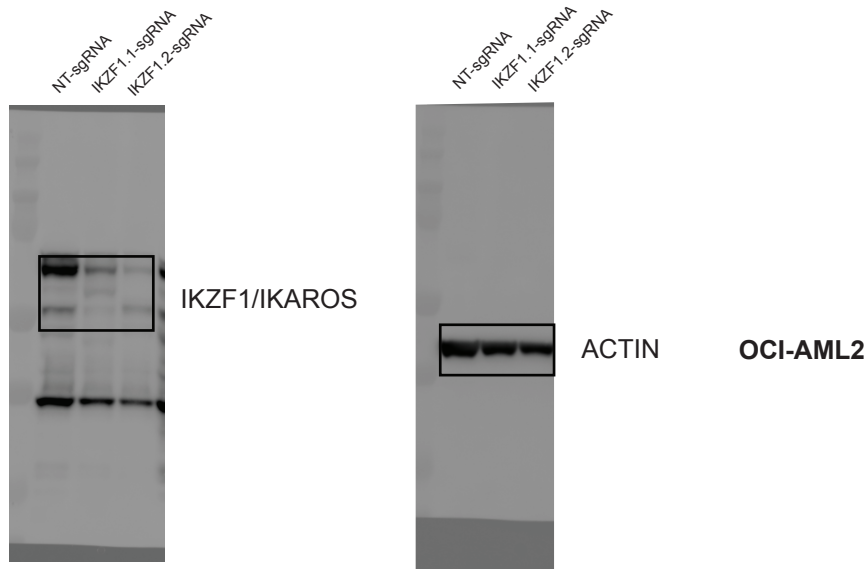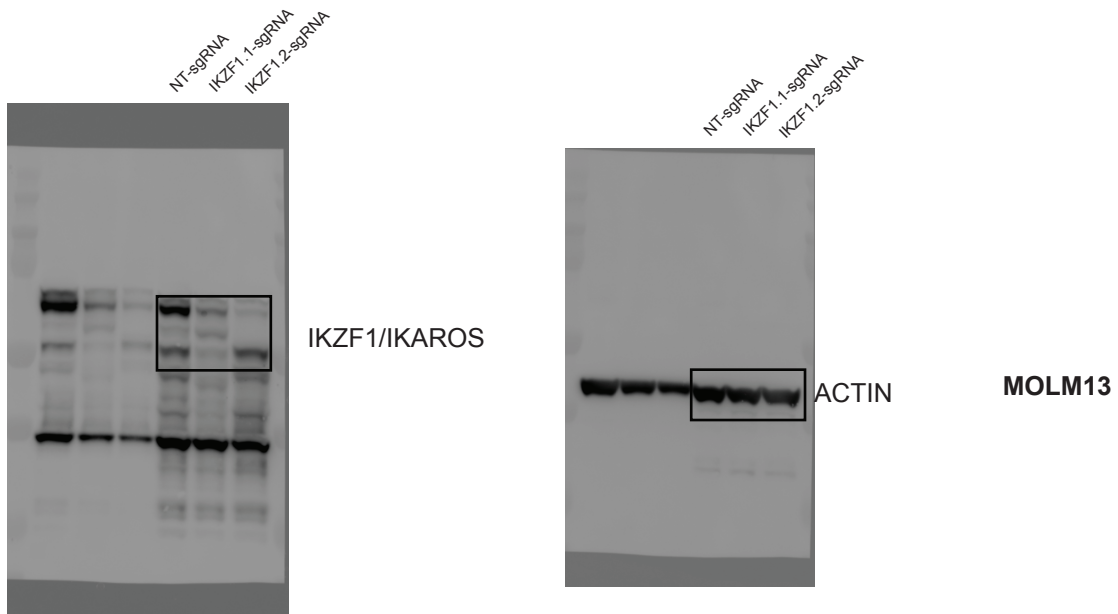

Supplement: NIHMS1788564-supplement-Extended_Date_Figure_2_Source_Data_Western_blot.pdf [file NIHMS1788564-supplement-Extended_Date_Figure_2_Source_Data_Western_blot.pdf]

# Extended Data Fig. 3 a

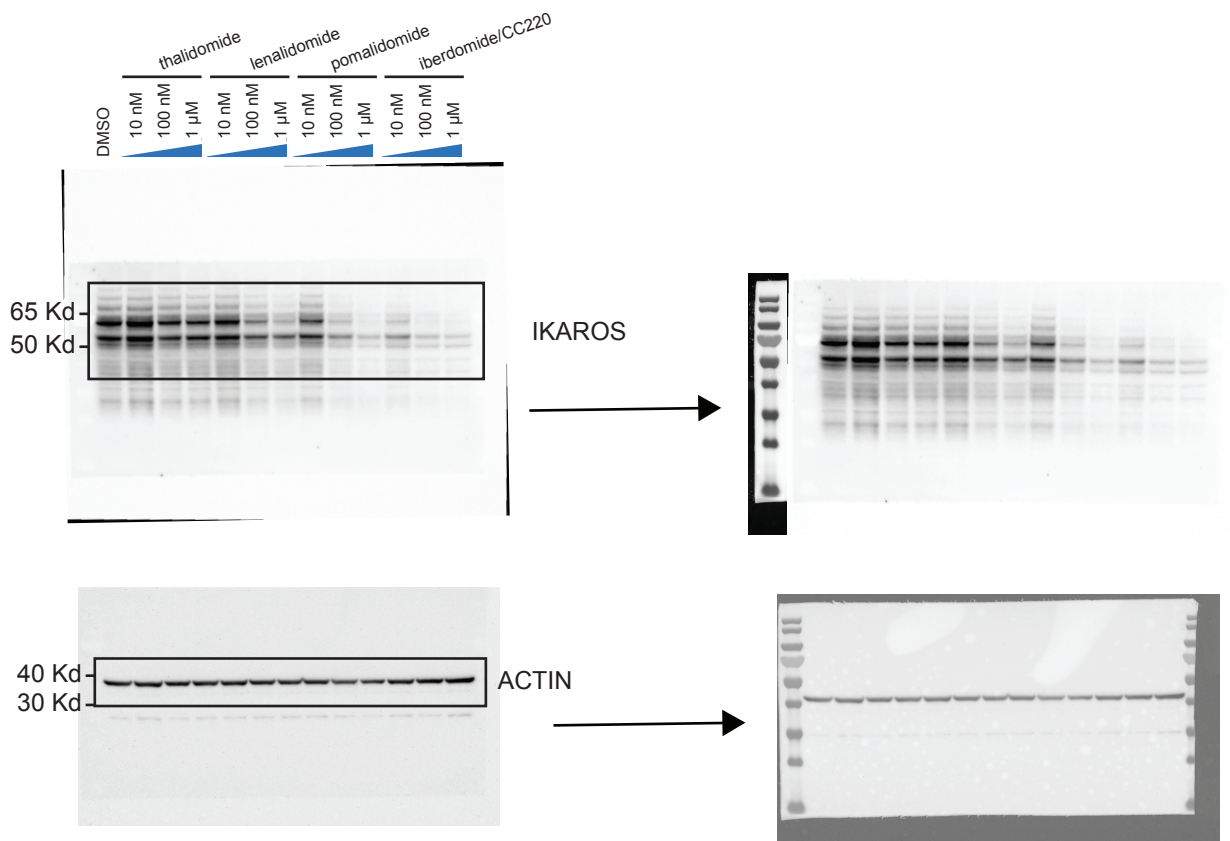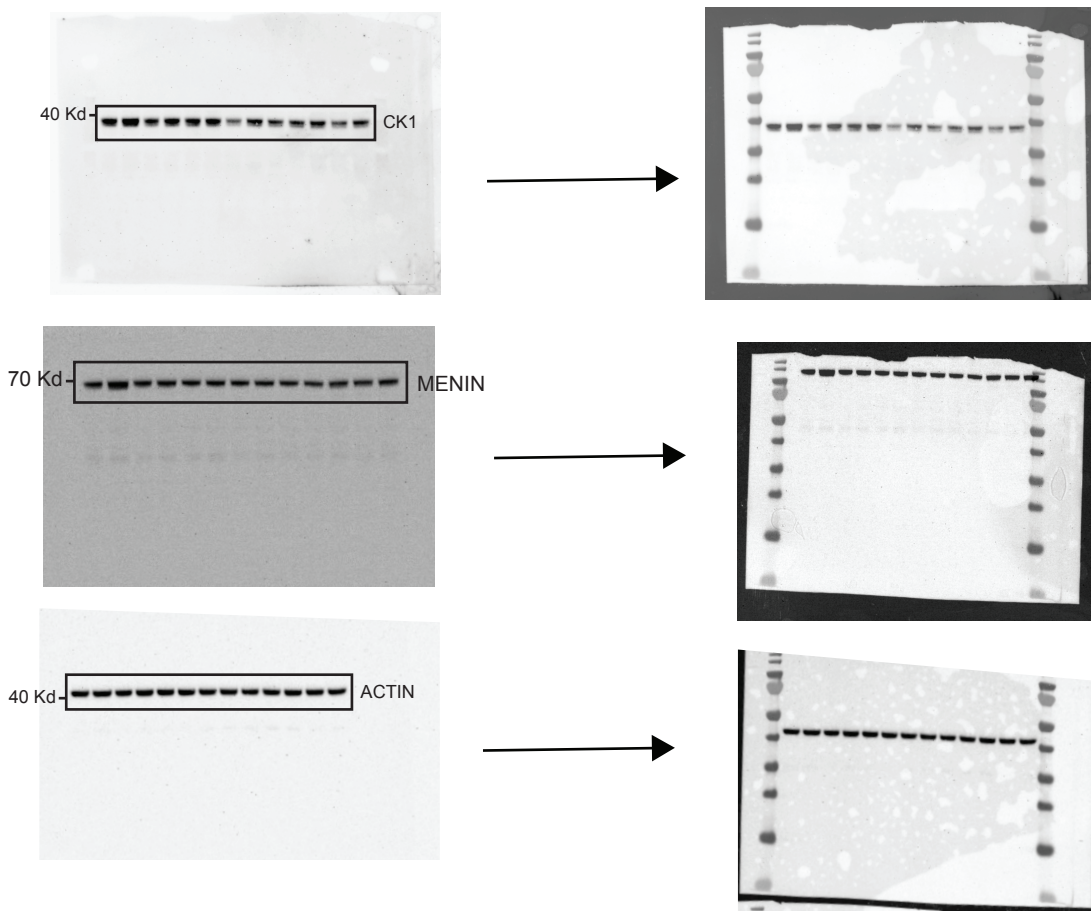

# Extended Data Fig. 3b

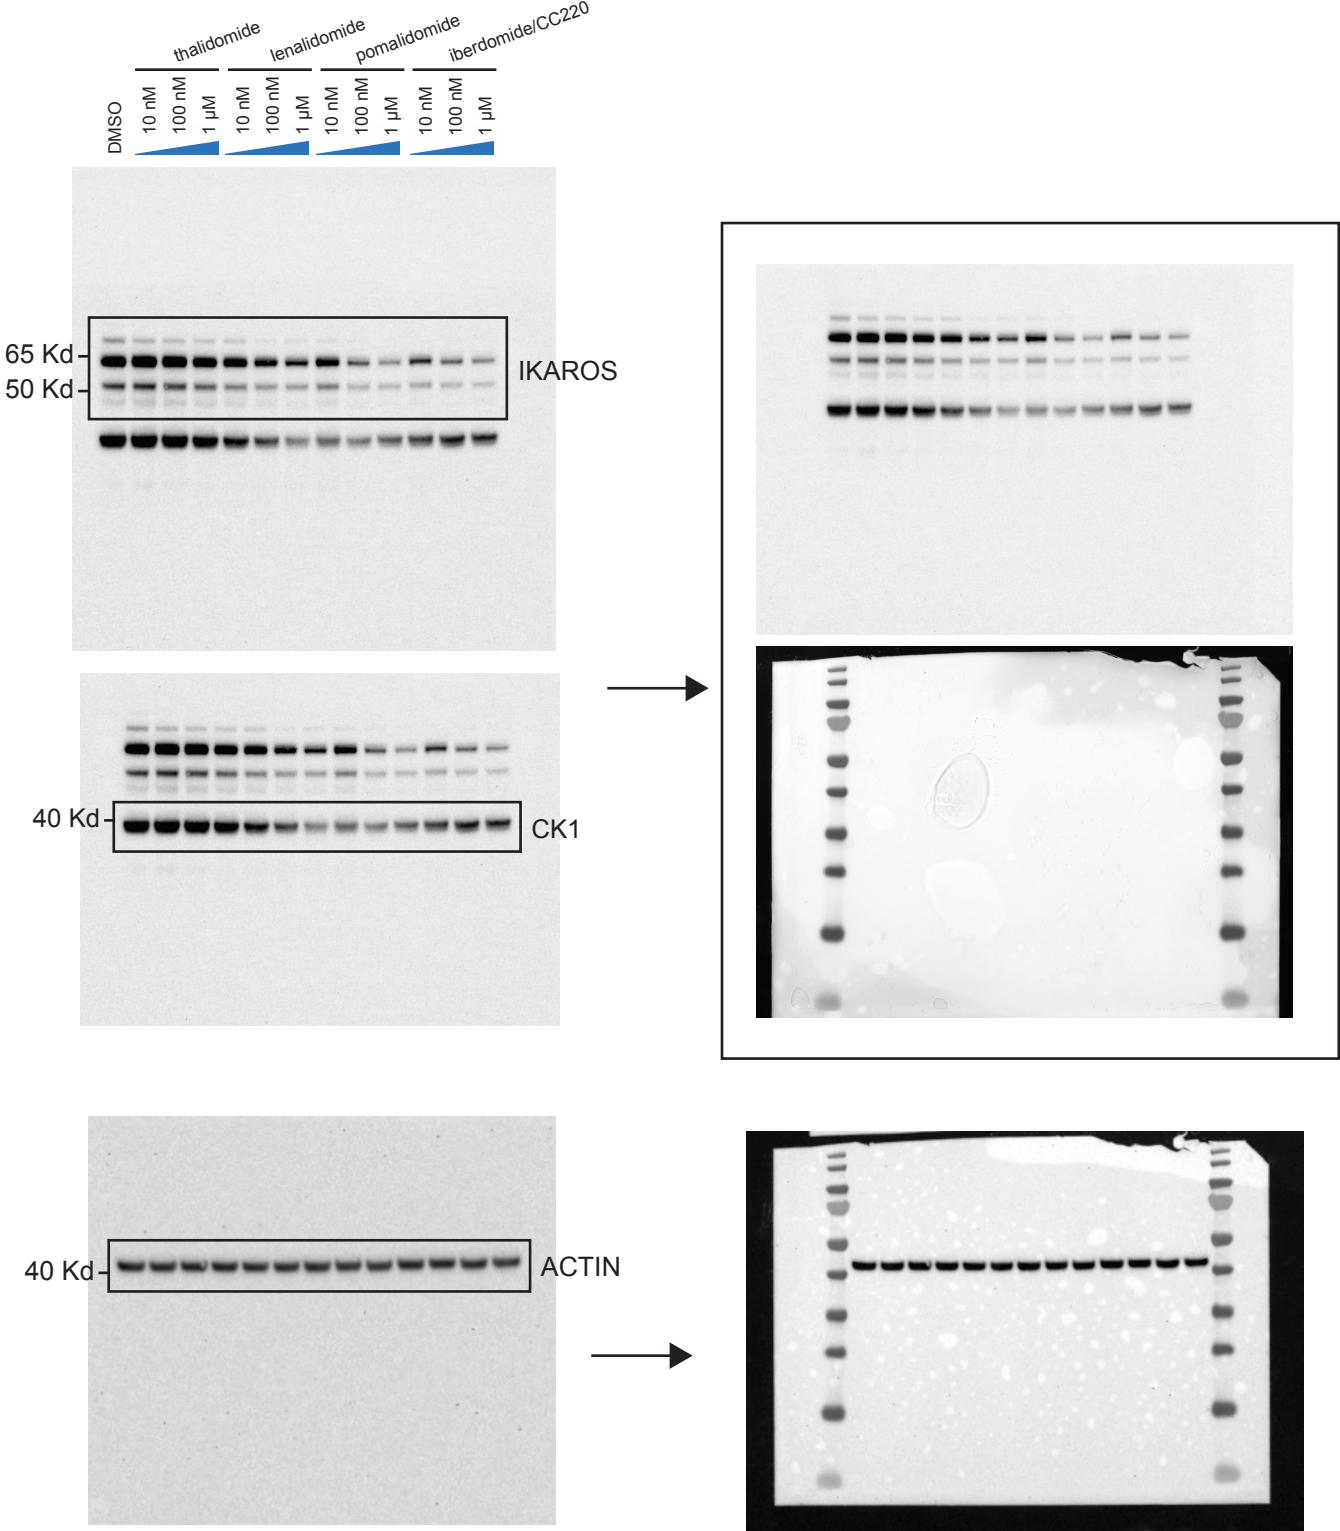

Supplement: NIHMS1788564-supplement-Extended_Date_Figure_3_Source_Data_Western_blot.pdf [file NIHMS1788564-supplement-Extended_Date_Figure_3_Source_Data_Western_blot.pdf]

# Extended Data Fig. 6

j

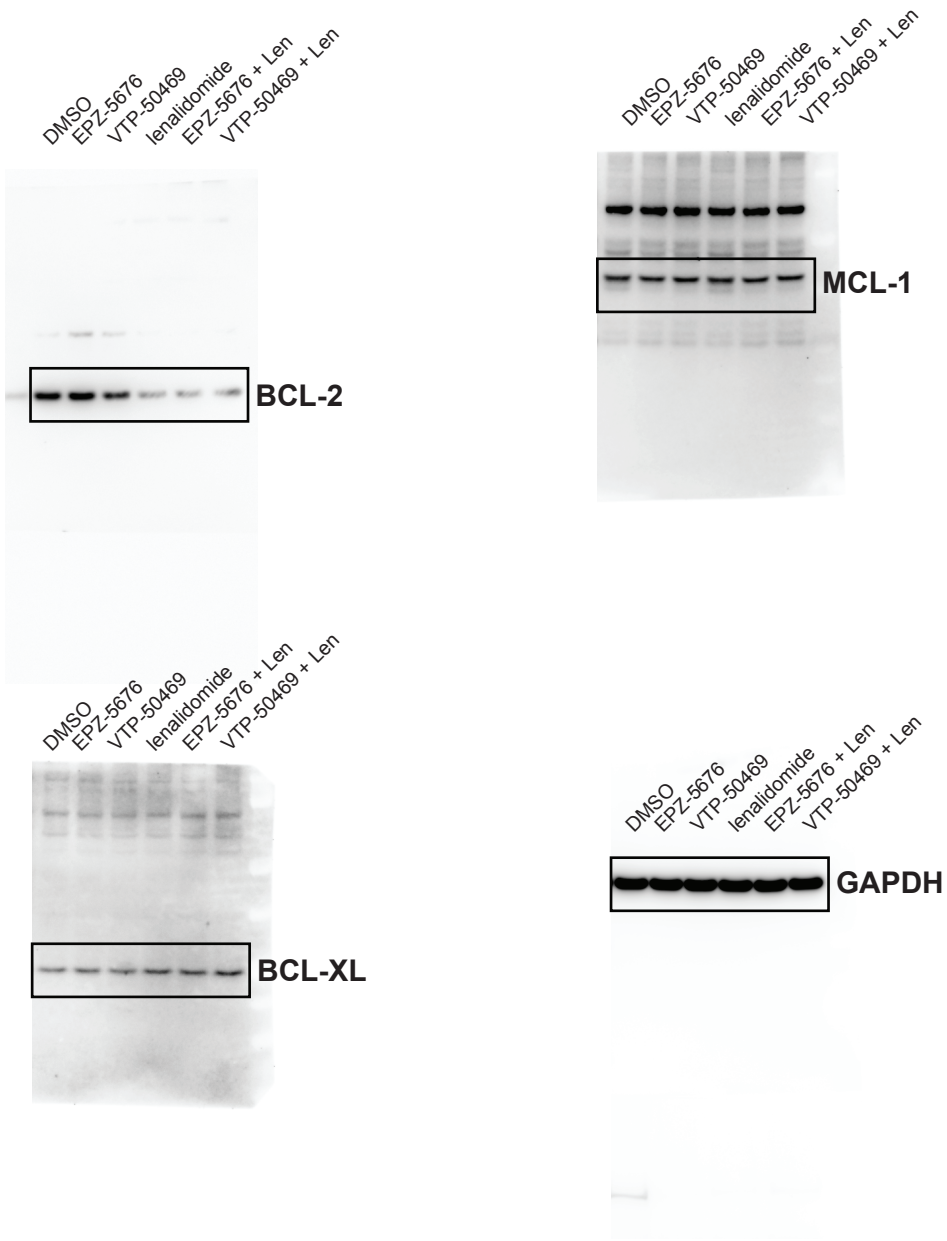

Supplement: NIHMS1788564-supplement-Extended_Date_Figure_6_Source_Data_Western_blot.pdf [file NIHMS1788564-supplement-Extended_Date_Figure_6_Source_Data_Western_blot.pdf]

# Extended Data Fig. 7

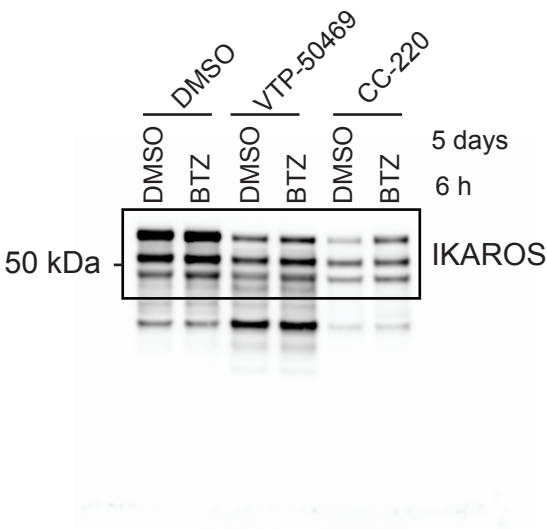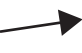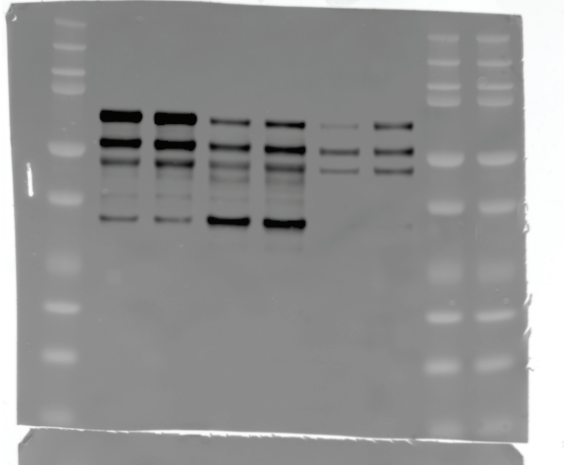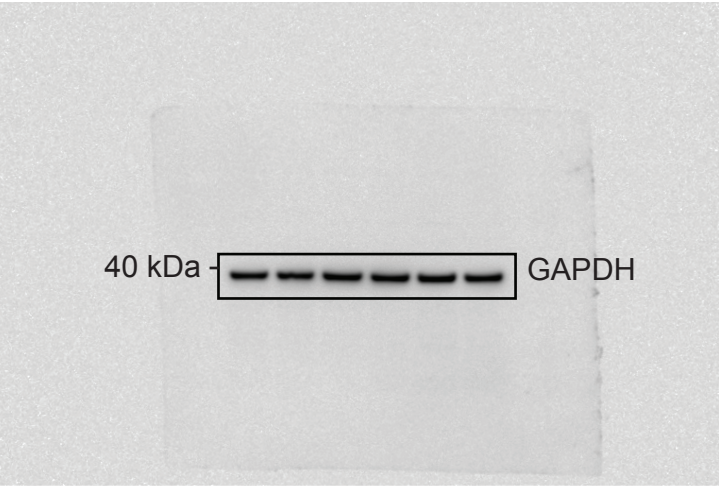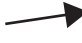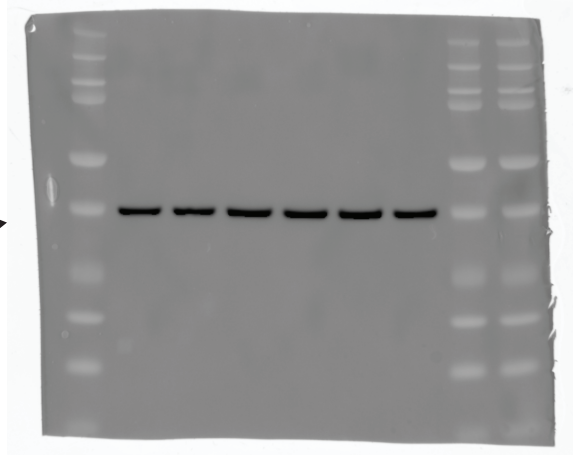

Supplement: NIHMS1788564-supplement-Extended_Date_Figure_7_Source_Data_Western_blot.pdf [file NIHMS1788564-supplement-Extended_Date_Figure_7_Source_Data_Western_blot.pdf]

# Extended Data Fig. 8

e

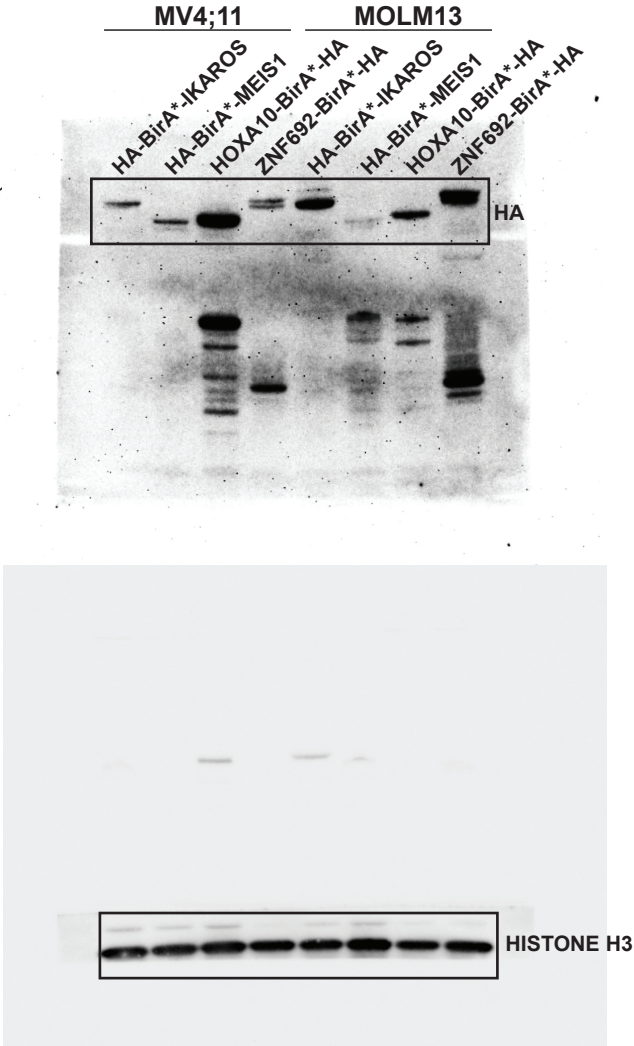

Supplement: NIHMS1788564-supplement-Extended_Date_Figure_8_Source_Data_Western_blot.pdf [file NIHMS1788564-supplement-Extended_Date_Figure_8_Source_Data_Western_blot.pdf]

# Extended Data Fig. 9

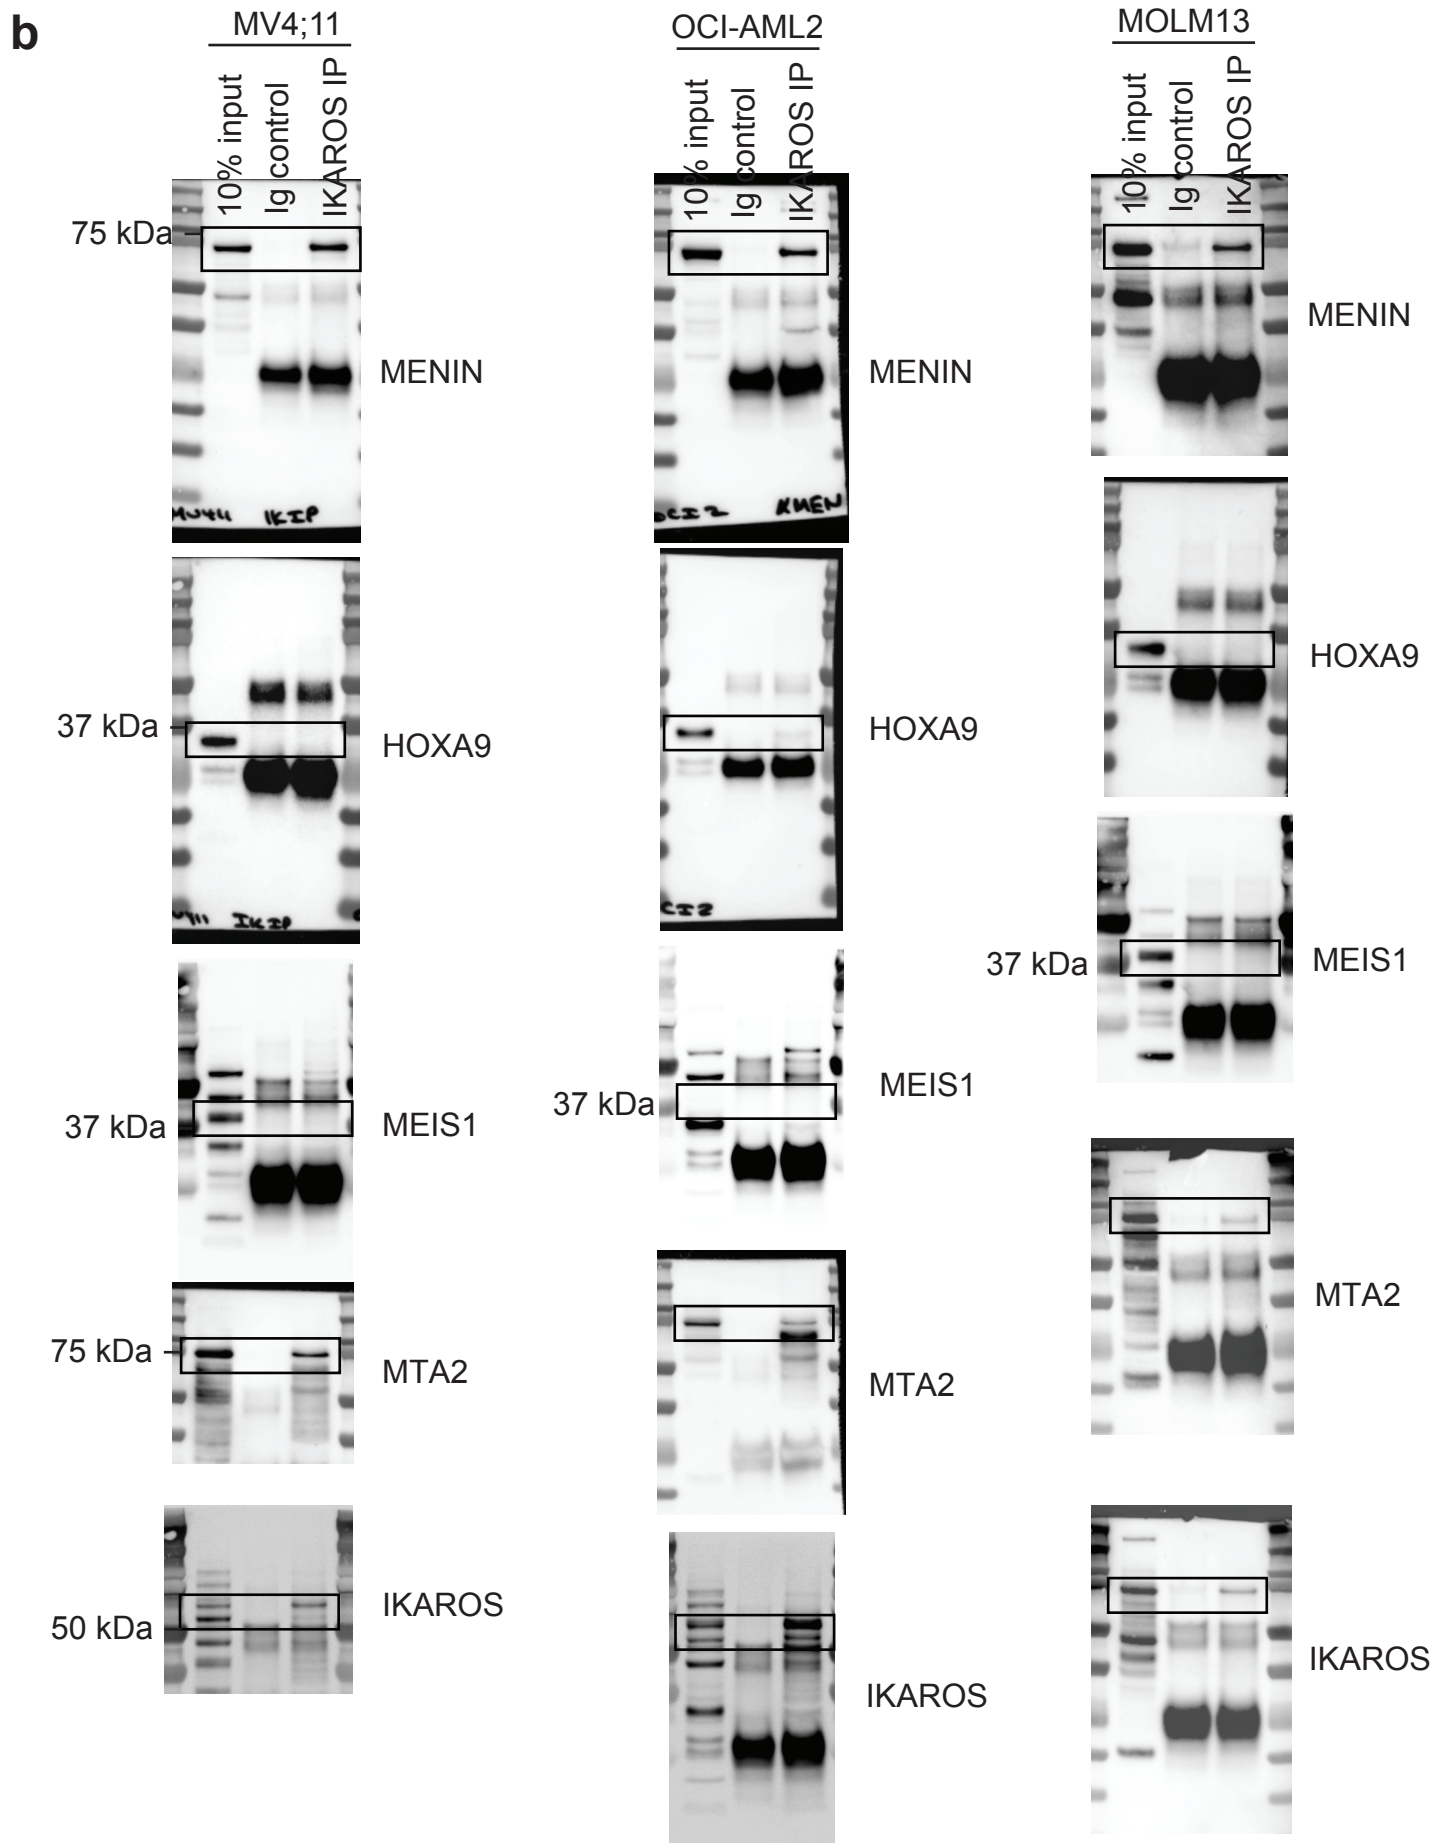

# Extended Data Fig. 9

**C**

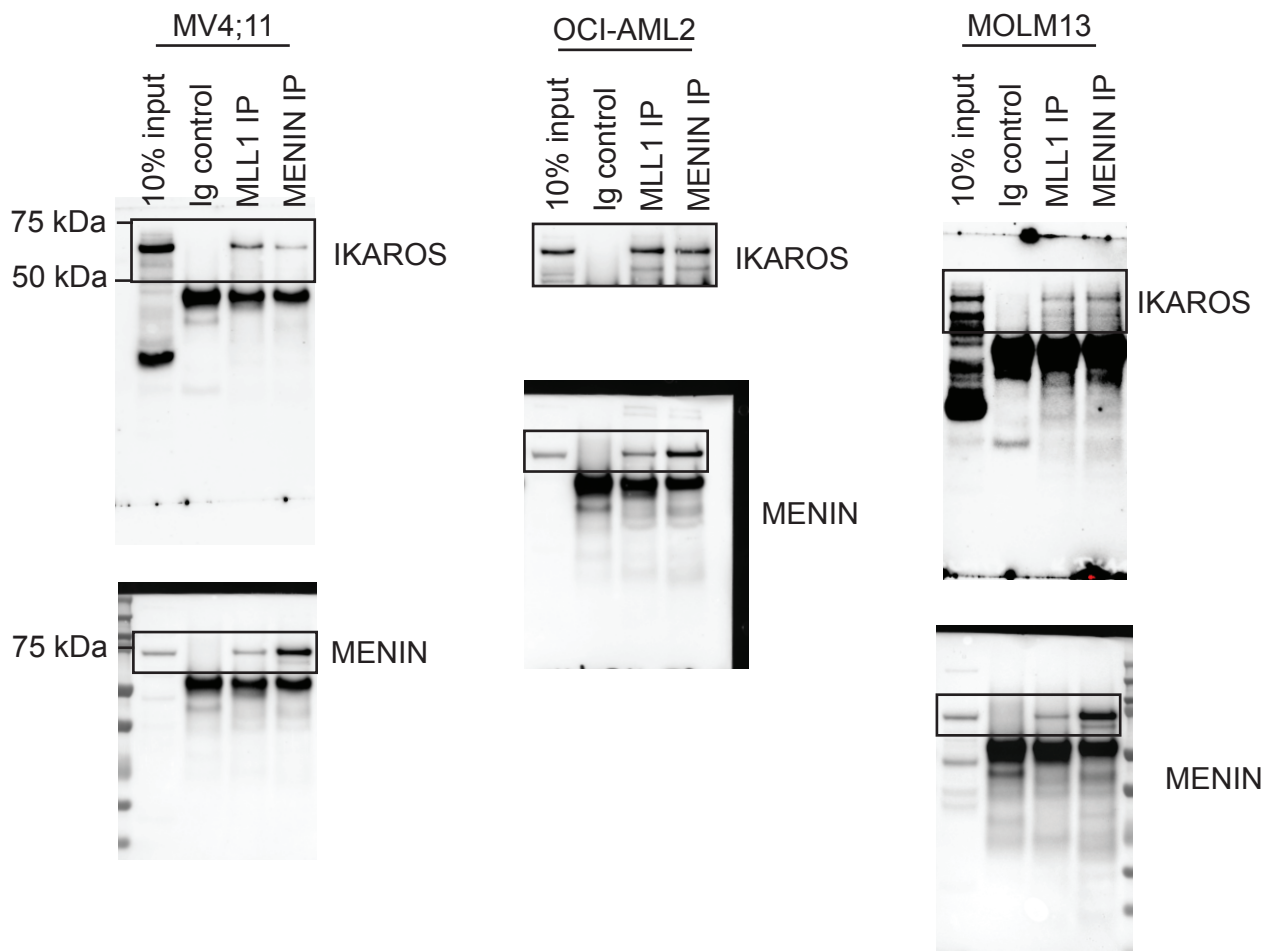





# Extended Data Fig. 9

e

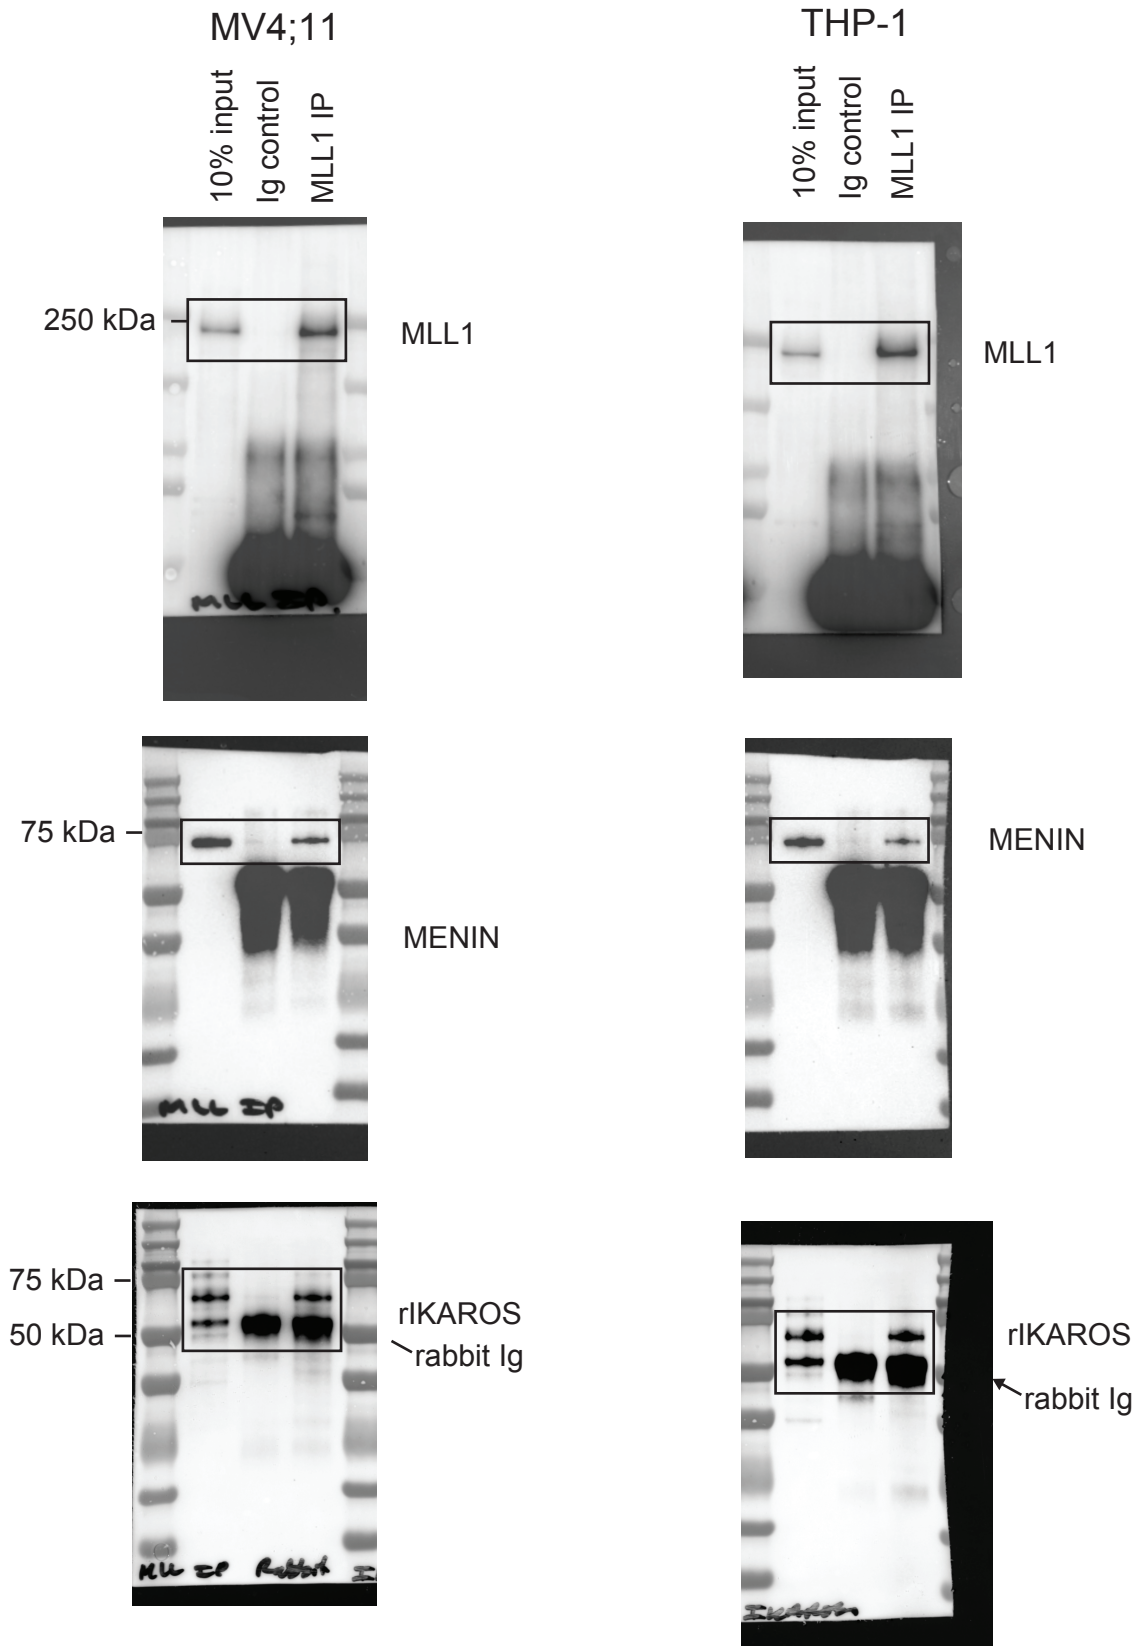

# Extended Data Fig. 9

f

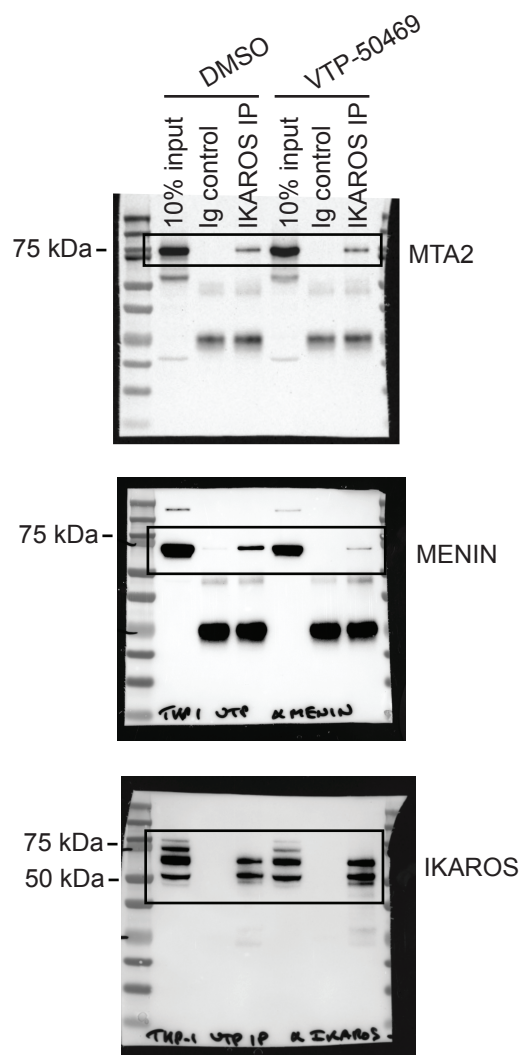

Supplement: NIHMS1788564-supplement-Extended_Date_Figure_9_Source_Data_Western_blot.pdf [file NIHMS1788564-supplement-Extended_Date_Figure_9_Source_Data_Western_blot.pdf]

# Extended Data Fig. 9

**C**



Supplement: NIHMS1788564-supplement-Extended_Date_Figure_9c_Source_Data_Western_blot.pdf [file NIHMS1788564-supplement-Extended_Date_Figure_9c_Source_Data_Western_blot.pdf]

**Fig. 2**

**a**

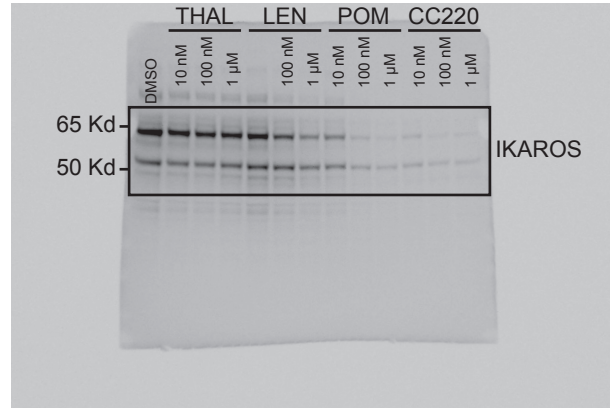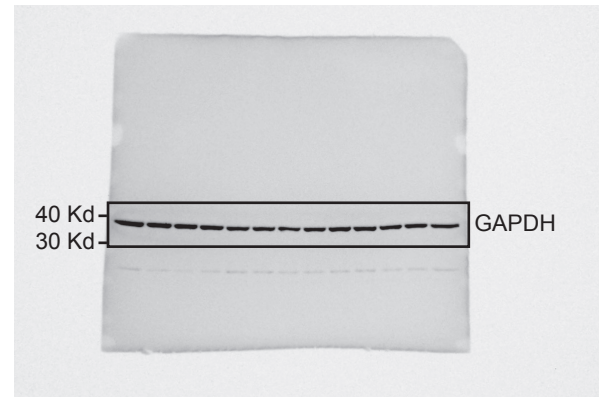

**g**

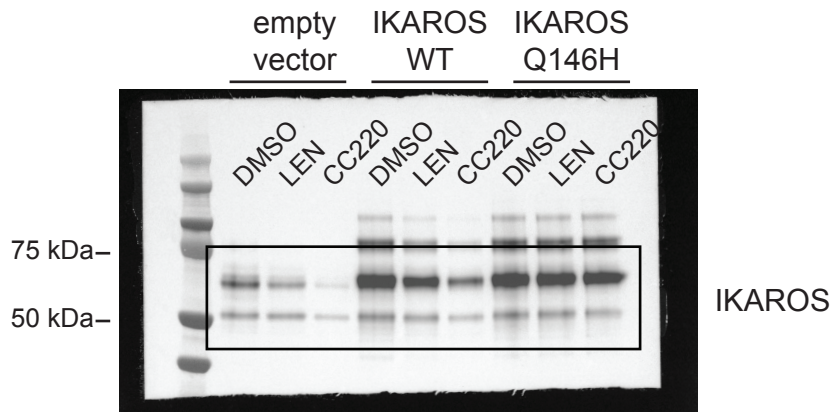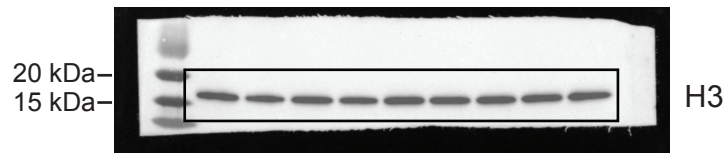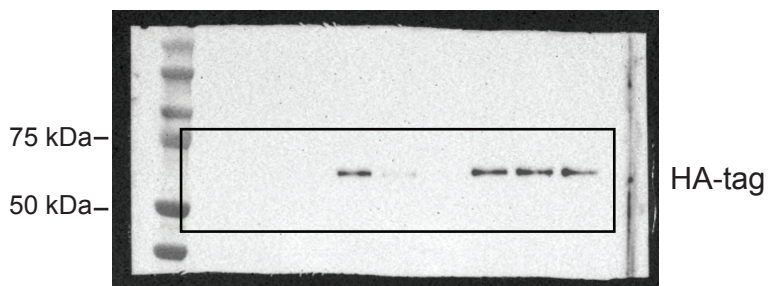

Supplement: NIHMS1788564-supplement-Figure_2_Source_Data_Western_blot.pdf [file NIHMS1788564-supplement-Figure_2_Source_Data_Western_blot.pdf]

# Fig. 4

## k

MOLM13 MV4;11

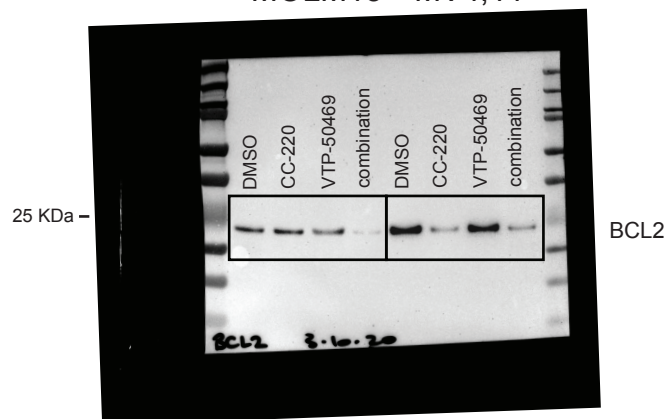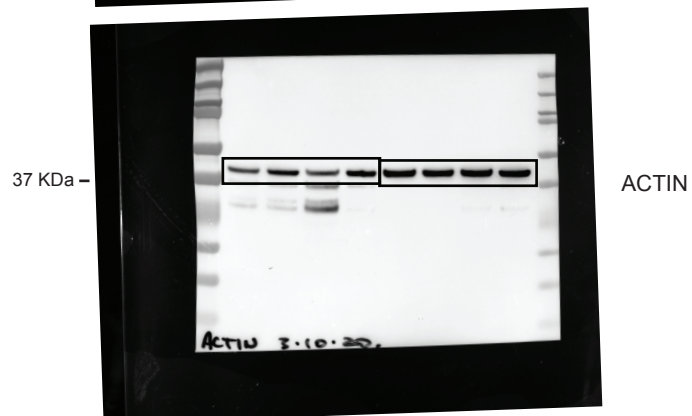

## l

DMSO  
len. 5  $\mu$ M  
CC-220 1  $\mu$ M  
VTP-50469 50 nM  
len. + VTP-50469  
CC220 + VTP-50469

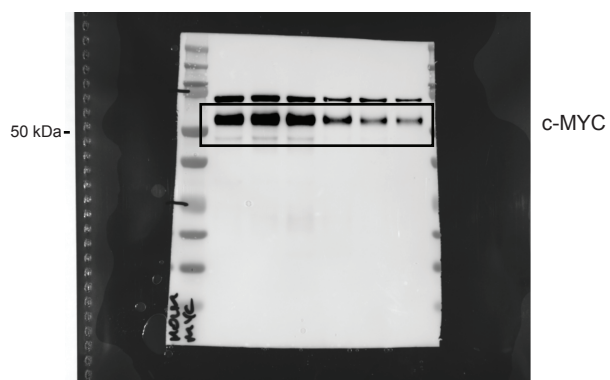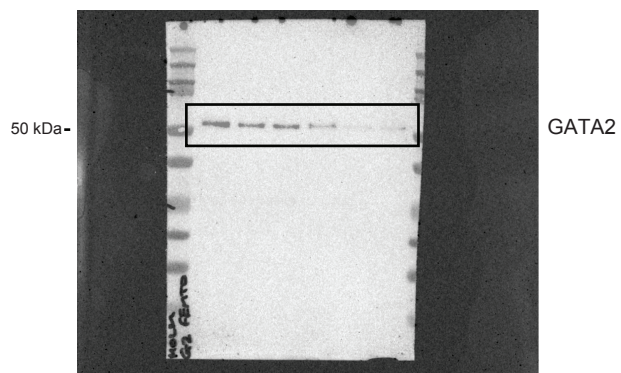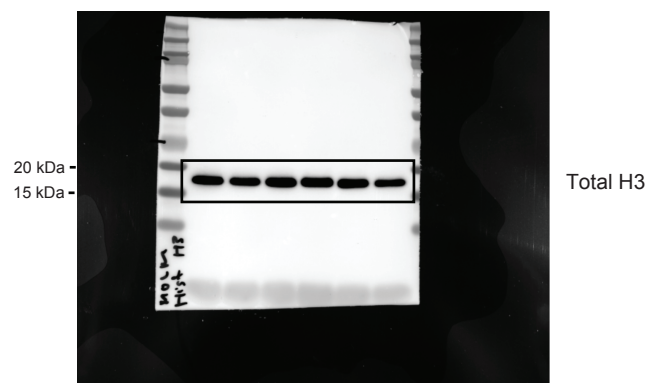

Supplement: NIHMS1788564-supplement-Figure_4_Source_Data_Western_blot.pdf [file NIHMS1788564-supplement-Figure_4_Source_Data_Western_blot.pdf]

**Fig. 5b**

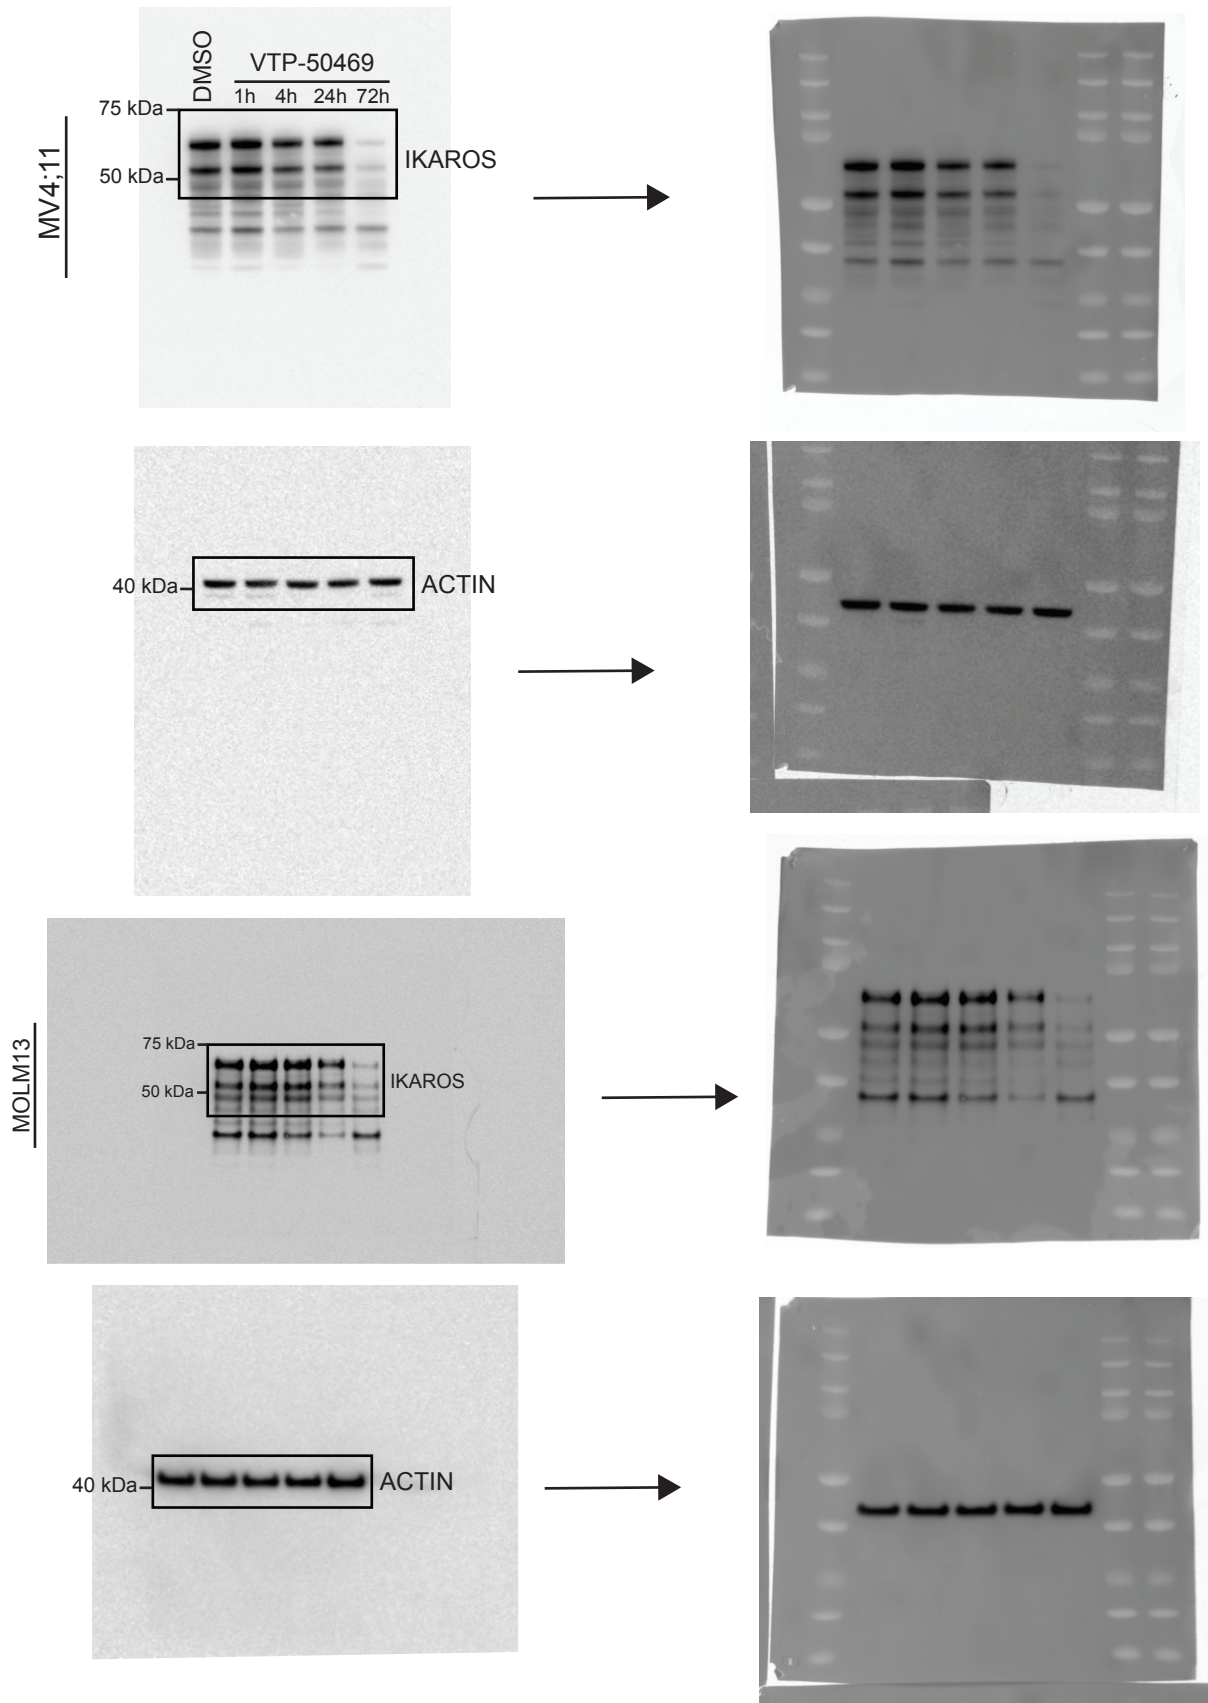

**Fig. 5c**

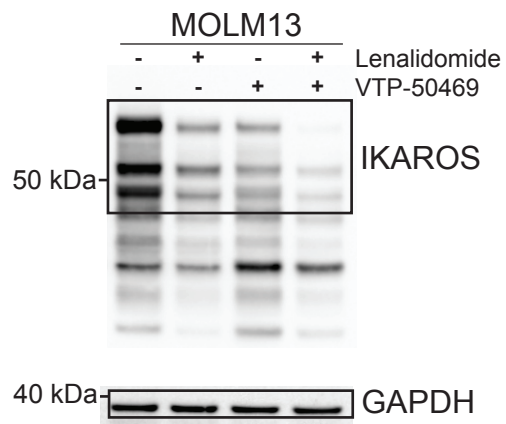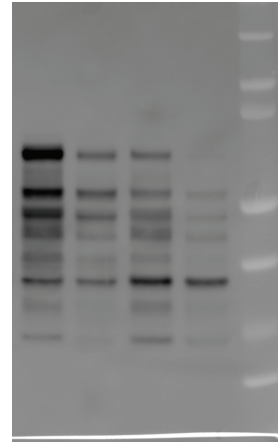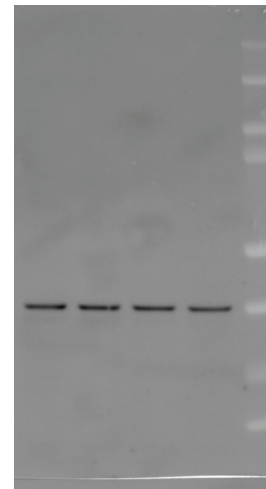

Supplement: NIHMS1788564-supplement-Figure_5_Source_Data_Western_blot.pdf [file NIHMS1788564-supplement-Figure_5_Source_Data_Western_blot.pdf]

**Fig. 6**

**g**

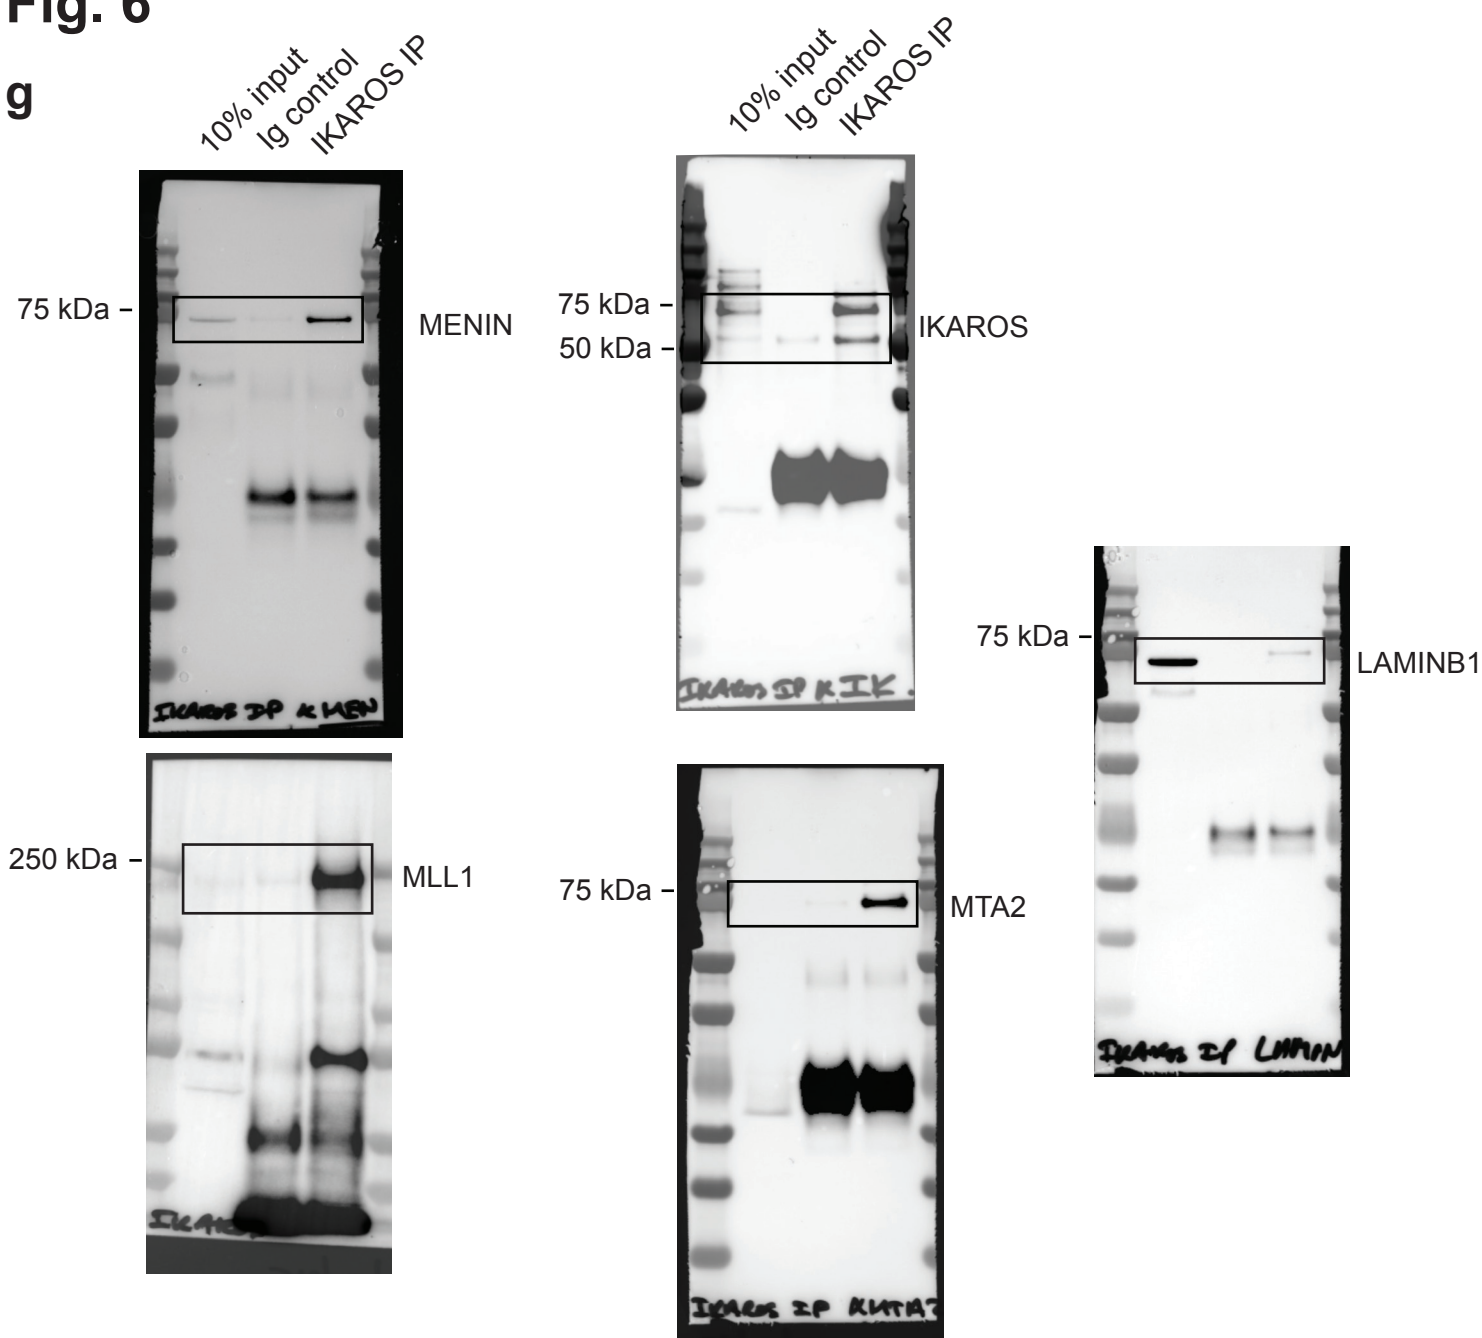

**h**

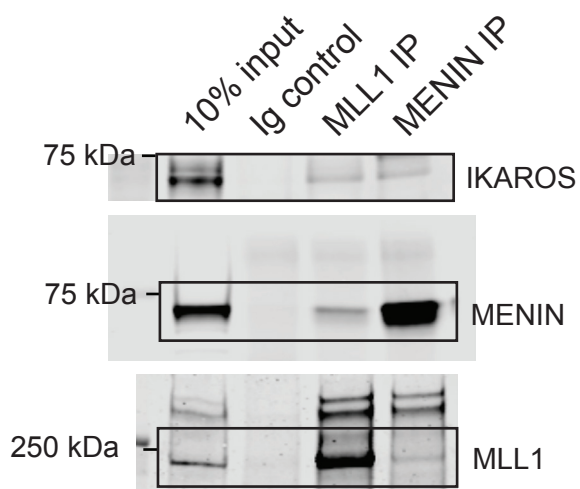

Supplement: NIHMS1788564-supplement-Figure_6_Source_Data_Western_blot.pdf [file NIHMS1788564-supplement-Figure_6_Source_Data_Western_blot.pdf]
